# Supplementary material for: A comparative study of stereopsis measurements: analyzing natural conditions versus dichoptic presentation using smartphones and ultraviolet printer technology
Source: PeerJ. 2024 Feb 12;12:e16941. doi: 10.7717/peerj.16941 (PMC10868522; doi:10.7717/peerj.16941)
Supplement: Supplemental Information 1 [file peerj-12-16941-s001.xlsx]

## Sheet: Sheet1
ID	Smartphone-0.5logMAR	Smartphone-0.4logMAR	Smartphone-0.3logMAR	Smartphone-0.2logMAR	Smartphone-0.1logMAR	Smartphone-0logMAR
1	120	60	30	30	20	20
2	110	60	20	20	20	20
3	180	180	90	40	30	30
4	240	240	240	40	40	40
5	240	240	180	140	60	30
6	80	30	30	30	30	30
7	100	50	40	30	20	20
8	160	80	40	40	40	30
9	240	100	80	40	40	30
10	190	140	90	40	30	30
11	100	60	40	20	20	20
12	50	50	20	20	10	10
13	200	160	120	100	20	20
14	240	240	140	70	60	60
15	200	100	60	50	20	20
16	240	150	140	110	60	40
17	240	240	240	200	80	30
18	200	120	60	50	30	30
19	150	50	40	30	20	20
20	200	140	50	50	50	50
21	140	90	80	60	40	10
22	160	140	110	80	60	30
23	240	240	240	200	100	60
24	240	240	190	160	60	30
25	240	240	240	200	180	90
26	240	240	120	100	60	30
27	240	240	200	200	80	30
28	140	80	60	40	30	20
29	240	170	100	50	40	20
30	100	90	70	50	40	20
