# Supplementary material for: A comparative study of stereopsis measurements: analyzing natural conditions versus dichoptic presentation using smartphones and ultraviolet printer technology
Source: PeerJ. 2024 Feb 12;12:e16941. doi: 10.7717/peerj.16941 (PMC10868522; doi:10.7717/peerj.16941)
Supplement: Supplemental Information 2 [file peerj-12-16941-s002.xlsx]

## Sheet: Sheet1
ID	Modified FNS-0.5logMAR	Modified FNS-0.4logMAR	Modified FNS-0.3logMAR	Modified FNS-0.2logMAR	Modified FNS-0.1logMAR	Modified FNS-0logMAR
1	160	120	50	50	30	20
2	80	60	20	10	10	10
3	240	200	50	50	40	30
4	240	240	240	20	20	20
5	190	160	110	40	30	30
6	90	60	30	20	20	20
7	80	80	50	30	30	20
8	200	80	40	20	10	10
9	180	50	40	20	20	20
10	170	110	70	30	30	20
11	30	30	20	10	10	10
12	40	40	30	20	10	10
13	240	190	130	60	20	20
14	240	160	120	40	20	20
15	200	180	100	20	20	20
16	160	110	90	40	10	10
17	150	110	90	80	40	10
18	200	90	50	20	10	10
19	70	50	40	20	10	10
20	240	170	50	20	20	10
21	90	80	70	40	30	10
22	160	140	100	90	50	30
23	240	200	200	160	120	30
24	200	180	160	120	60	20
25	190	190	170	160	110	30
26	240	200	160	50	30	20
27	240	150	140	80	40	10
28	130	70	60	30	30	20
29	240	200	170	60	20	10
30	120	100	80	40	30	20
